# Supplementary material for: ESIPT-active multi-color aggregation-induced emission features of triphenylamine–salicylaldehyde-based unsymmetrical azine family
Source: Royal Society of Chemistry journal article supplement (doi:10.1039/c9ce01490j), 2019-11-23
Supplement: c9ce01490j1.pdf [file c9ce01490j1.pdf]

## Electronic Supporting information

### **ESIPT active Multi-color Aggregation Induced Emission features of Triphenylamine-Salicylaldehyde based Unsymmetrical Azine Family**

Moorthy Mathivanan,<sup>a</sup> Balamurugan Tharmalingam,<sup>a</sup> Chia-Her Lin,<sup>b</sup> Baskaran Vijaya Pandiyan<sup>c</sup> Viruthachalam Thiagarajan<sup>d</sup> and Balasubramanian Murugesapandian<sup>\*a</sup>

<sup>a</sup>Department of Chemistry, Bharathiar University, Coimbatore, 641046, Tamil Nadu, India.  
E-mail: [mpandian@gmail.com](mailto:mpandian@gmail.com); Fax: +91-422-2422387; Tel: +91-422-2428312.

<sup>b</sup>Department of Chemistry, National Taiwan Normal University, Taipei, Taiwan.

<sup>c</sup>Department of Biotechnology, Indian Institute of Technology, Madras. India.

<sup>d</sup>School of Chemistry, Bharathidasan University, Tiruchirappalli, 620024, Tamil Nadu, India.

#### **Table of contents**

| <b>S.No</b> | <b>Contents</b>                                                                  | <b>Page No</b> |
|-------------|----------------------------------------------------------------------------------|----------------|
| 1           | Figure S1. <sup>1</sup> H NMR spectra of L <sub>1</sub> in CDCl <sub>3</sub> .   | 3              |
| 2           | Figure S2. <sup>13</sup> C NMR spectra of L <sub>1</sub> in CDCl <sub>3</sub> .  | 3              |
| 3           | Figure S3. Mass spectra of L <sub>1</sub> in DMSO.                               | 4              |
| 4           | Figure S4. FT-IR spectra of L <sub>1</sub> .                                     | 4              |
| 5           | Figure S5. <sup>1</sup> H NMR spectra of L <sub>2</sub> in CDCl <sub>3</sub> .   | 5              |
| 6           | Figure S6. <sup>13</sup> C NMR spectra of L <sub>2</sub> in CDCl <sub>3</sub> .  | 5              |
| 7           | Figure S7. Mass spectra of L <sub>2</sub> in DMSO.                               | 6              |
| 8           | Figure S8. FT-IR spectra of L <sub>2</sub> .                                     | 6              |
| 9           | Figure S9. <sup>1</sup> H NMR spectra of L <sub>3</sub> in CDCl <sub>3</sub> .   | 7              |
| 10          | Figure S10. <sup>13</sup> C NMR spectra of L <sub>3</sub> in CDCl <sub>3</sub> . | 7              |
| 11          | Figure S11. Mass spectra of L <sub>3</sub> in DMSO.                              | 8              |
| 12          | Figure S12. FT-IR spectra of L <sub>3</sub> .                                    | 8              |
| 13          | Figure S13. <sup>1</sup> H NMR spectra of L <sub>4</sub> in CDCl <sub>3</sub> .  | 9              |
| 14          | Figure S14. <sup>13</sup> C NMR spectra of L <sub>4</sub> in CDCl <sub>3</sub> . | 9              |

|    |                                                                                                                                                       |    |
|----|-------------------------------------------------------------------------------------------------------------------------------------------------------|----|
| 15 | Figure S15. Mass spectra of L <sub>4</sub> in DMSO.                                                                                                   | 10 |
| 16 | Figure S16. FT-IR spectra of L <sub>4</sub> .                                                                                                         | 10 |
| 17 | Table S1. Optical transitions of L <sub>1</sub> – L <sub>4</sub> in different solvents.                                                               | 11 |
| 18 | Figure S17. Normalized absorption spectra of the compounds (L <sub>1</sub> -L <sub>4</sub> ).                                                         | 12 |
| 19 | Figure S18. Normalized emission spectra of the compounds L <sub>1</sub> -L <sub>4</sub> in cyclohexane.                                               | 12 |
| 20 | Figure S19. Normalized solid state emission spectra of the compounds L <sub>1</sub> -L <sub>4</sub> .                                                 | 13 |
| 21 | Figure S20. Fluorescence photograph of the compounds in different organic solvents from low polar to high polar under UV lamp (365 nm).               | 13 |
| 22 | Table S2. Aggregation induced emission life time values of the L <sub>1</sub> -L <sub>4</sub> .                                                       | 14 |
| 23 | Figure S21. Absorption spectra of the compounds upon increasing THF-water mixture 0-99%.                                                              | 14 |
| 24 | Figure S22. Fluorescence spectrum of compounds in THF-water and THF-glycerol mixture.                                                                 | 15 |
| 25 | Figure S23. Dynamic light scattering measurements of compounds with particle size distribution in (THF-water 0%, 70% and 99%).                        | 16 |
| 26 | Figure S24. Non planar nature of molecular structure of L <sub>1</sub> -L <sub>4</sub> .                                                              | 16 |
| 27 | Figure S25. Emission curve intensities of compounds as a function of pH values.                                                                       | 17 |
| 28 | Figure S26. Positive ESI mass spectra of L <sub>3</sub> in MeOH after the addition of a drop of TFA acid.                                             | 17 |
| 29 | Figure S27. A) Absorption titration of L <sub>3</sub> as a function of pH values. B) Emission titration of L <sub>3</sub> as a function of pH values. | 18 |
| 30 | Figure S28. Optimized molecular structures of the compounds L <sub>1</sub> -L <sub>4</sub>                                                            | 18 |
| 31 | Table S3. Crystal data and details of the structure determination of L <sub>1</sub> , L <sub>2</sub> , L <sub>3</sub> and L <sub>4</sub> .            | 19 |

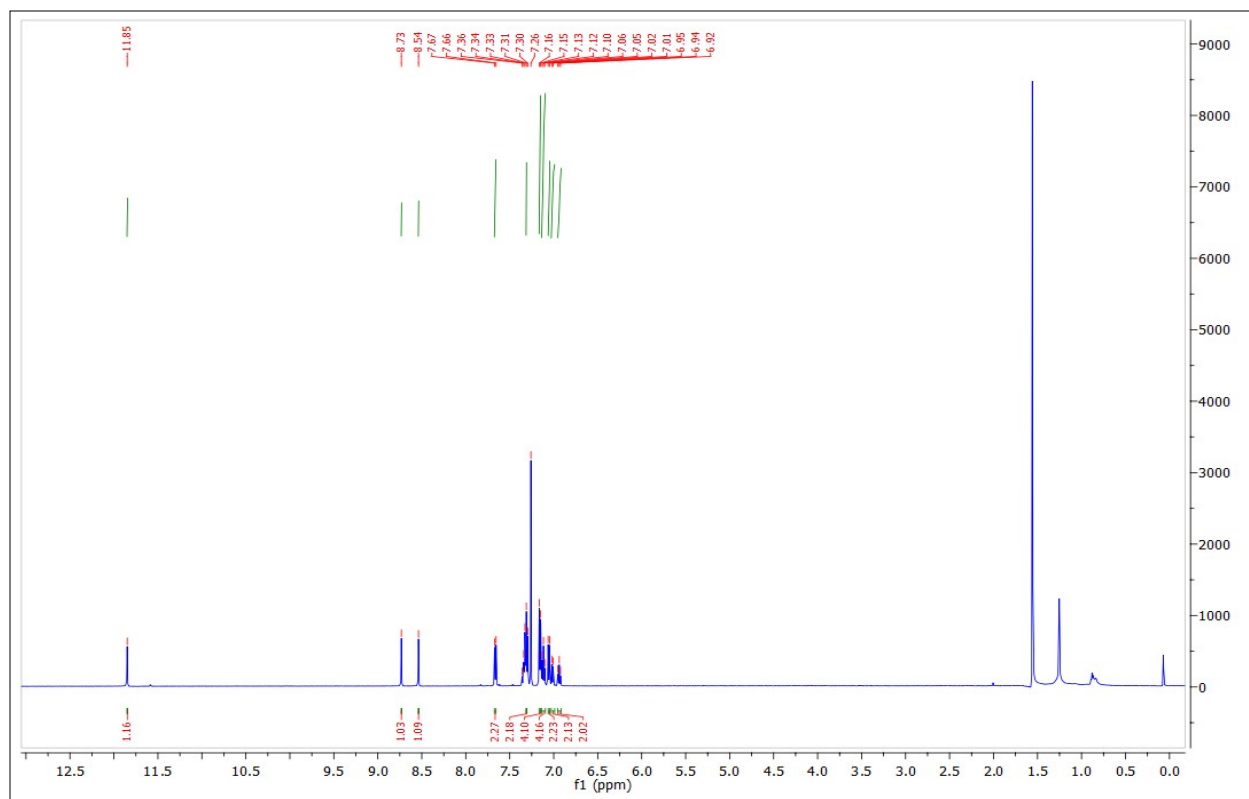

Figure S1.  $^1\text{H}$  NMR spectra of  $\text{L}_1$ .

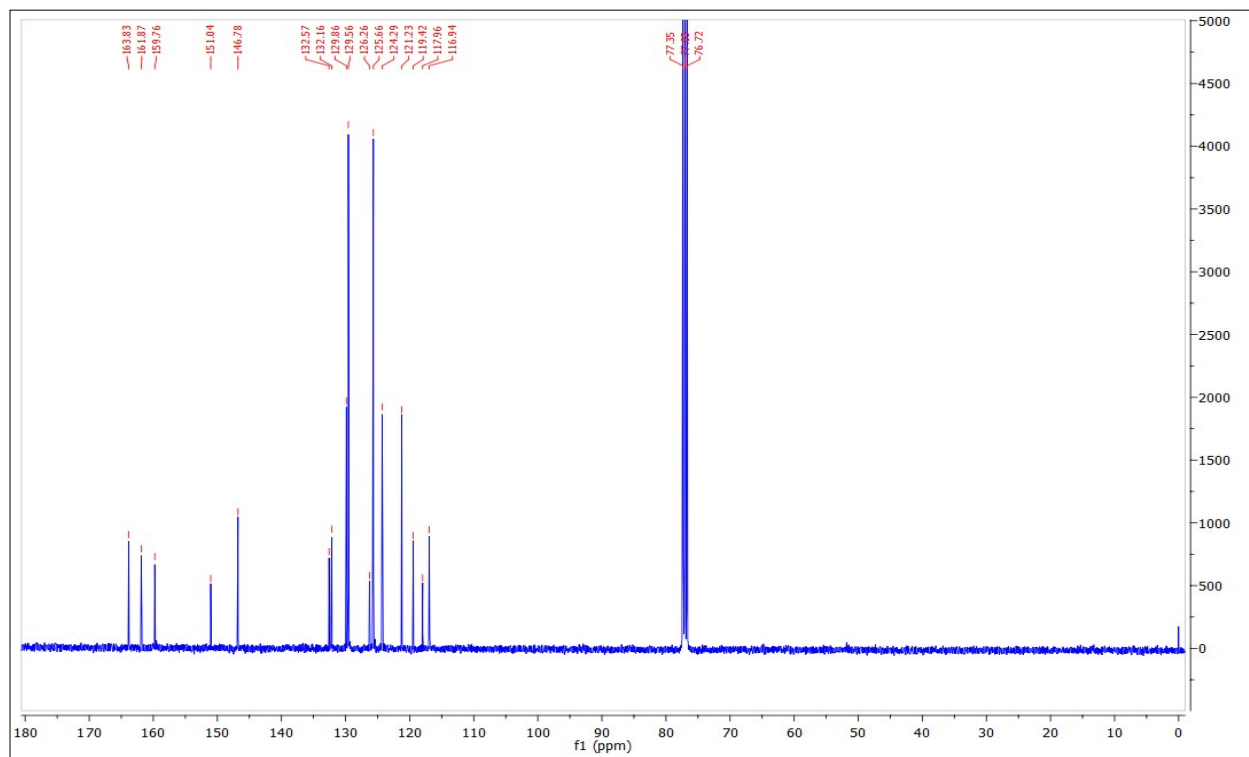

Figure S2.  $^{13}\text{C}$  NMR spectra of  $\text{L}_1$ .

### Single Mass Analysis

Tolerance = 5.0 PPM / DBE: min = -1.5, max = 50.0

Element prediction: Off

Number of isotope peaks used for i-FIT = 3

Monoisotopic Mass, Even Electron Ions

19 formula(e) evaluated with 1 results within limits (all results (up to 1000) for each mass)

Elements Used:

C: 25-30 H: 20-25 N: 0-5 O: 0-5

2P-80 57 (1.888) Cm (1:61)

TOF MS AP+

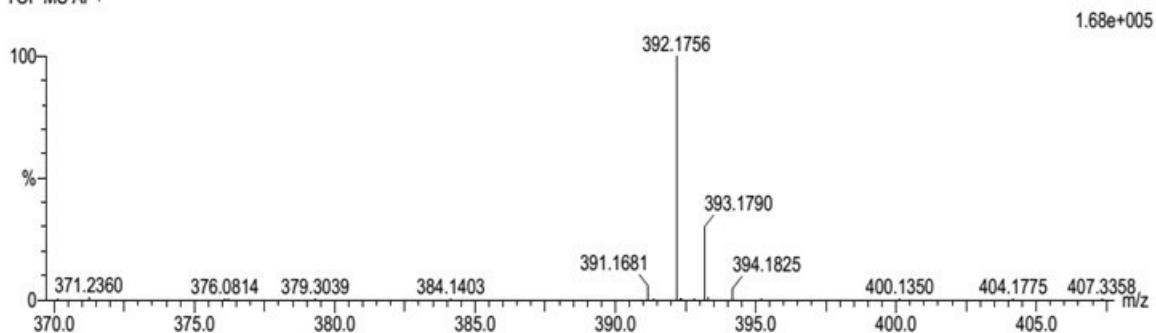

Figure S3. Mass spectra of L<sub>1</sub>.

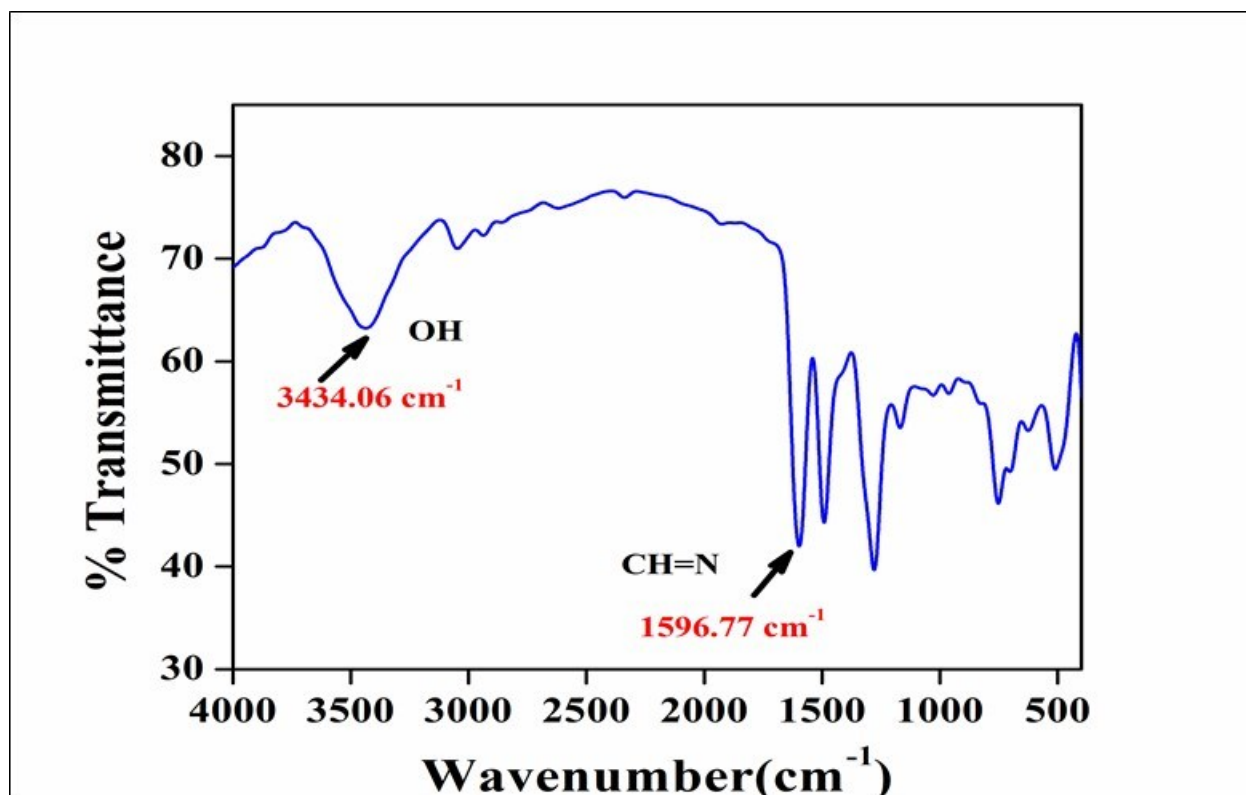

Figure S4. FT-IR spectra of L<sub>1</sub>.

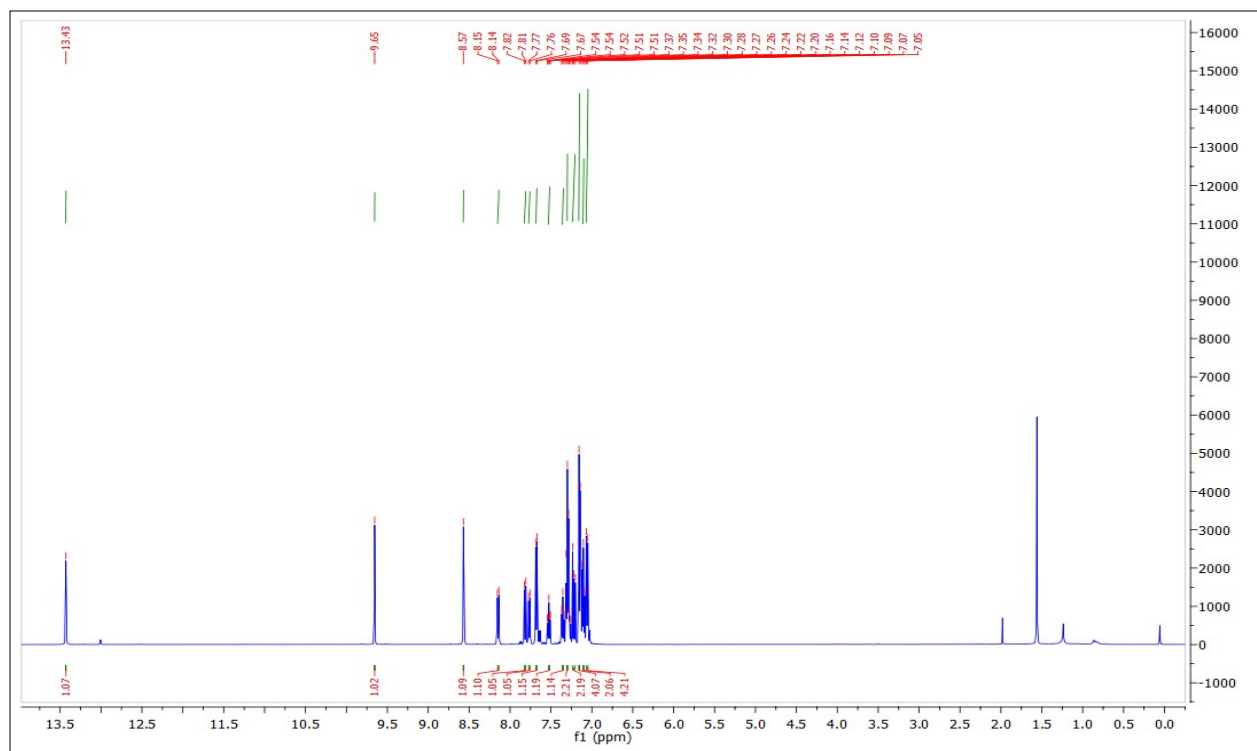

Figure S5.  $^1\text{H}$  NMR spectra of  $\text{L}_2$ .

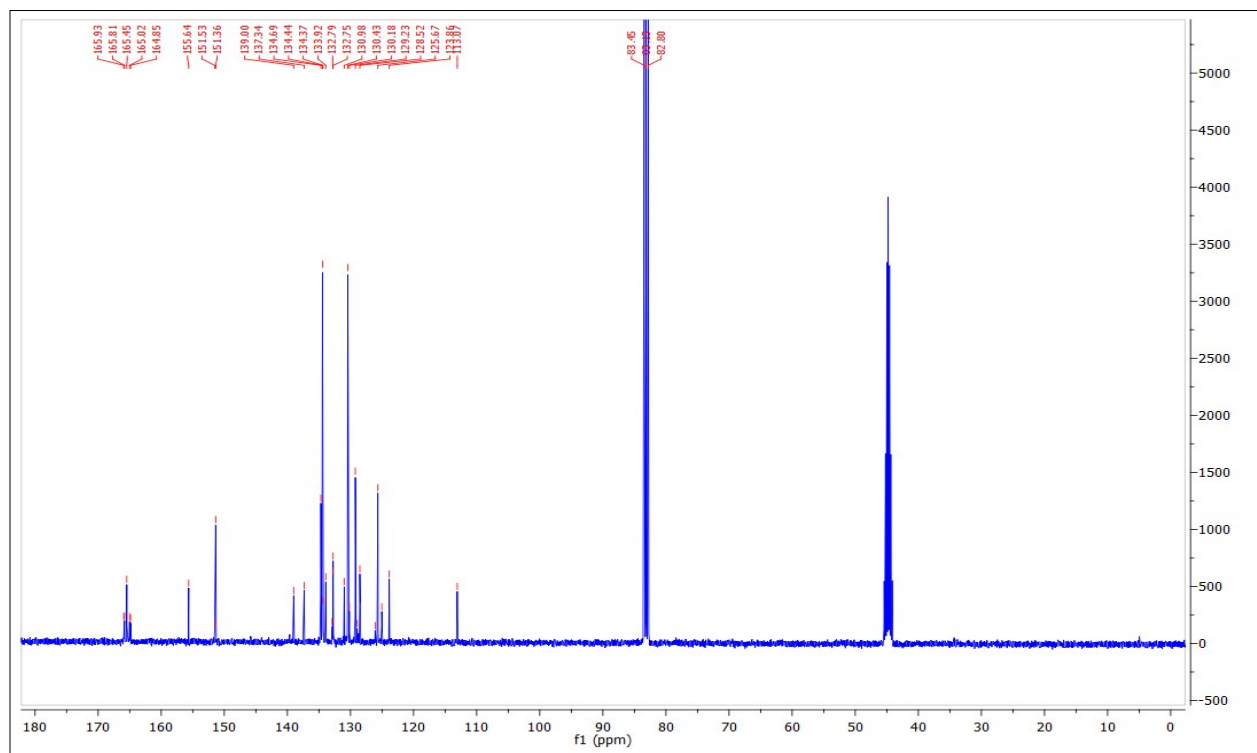

Figure S6.  $^{13}\text{C}$  NMR spectra of  $\text{L}_2$ .

## Elemental Composition Report

Page 1

### Single Mass Analysis

Tolerance = 5.0 PPM / DBE: min = -1.5, max = 500.0

Element prediction: Off

Number of isotope peaks used for i-FIT = 2

Monoisotopic Mass, Even Electron Ions

13 formula(e) evaluated with 1 results within limits (all results (up to 1000) for each mass)

Elements Used:

C: 25-30 H: 20-25 N: 1-5 O: 0-5

2P-20 55 (1.821) Cm (1.61)

TOF MS ES-

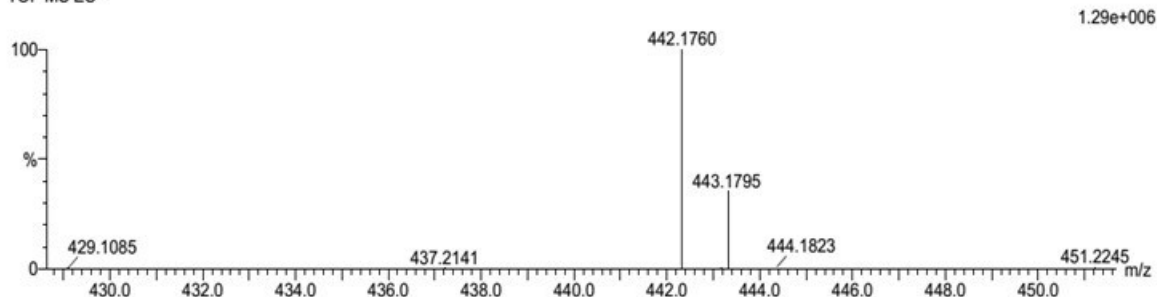

Figure S7. Mass spectra of L<sub>2</sub>.

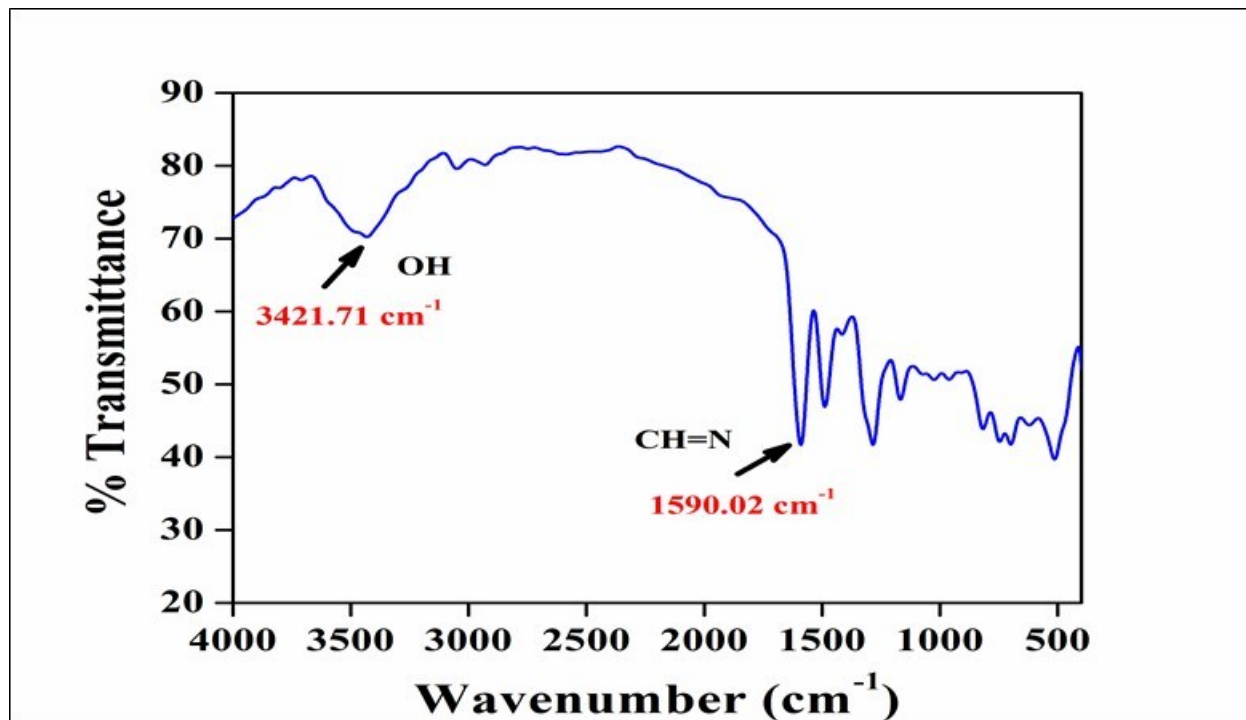

Figure S8. FT-IR spectra of L<sub>2</sub>.

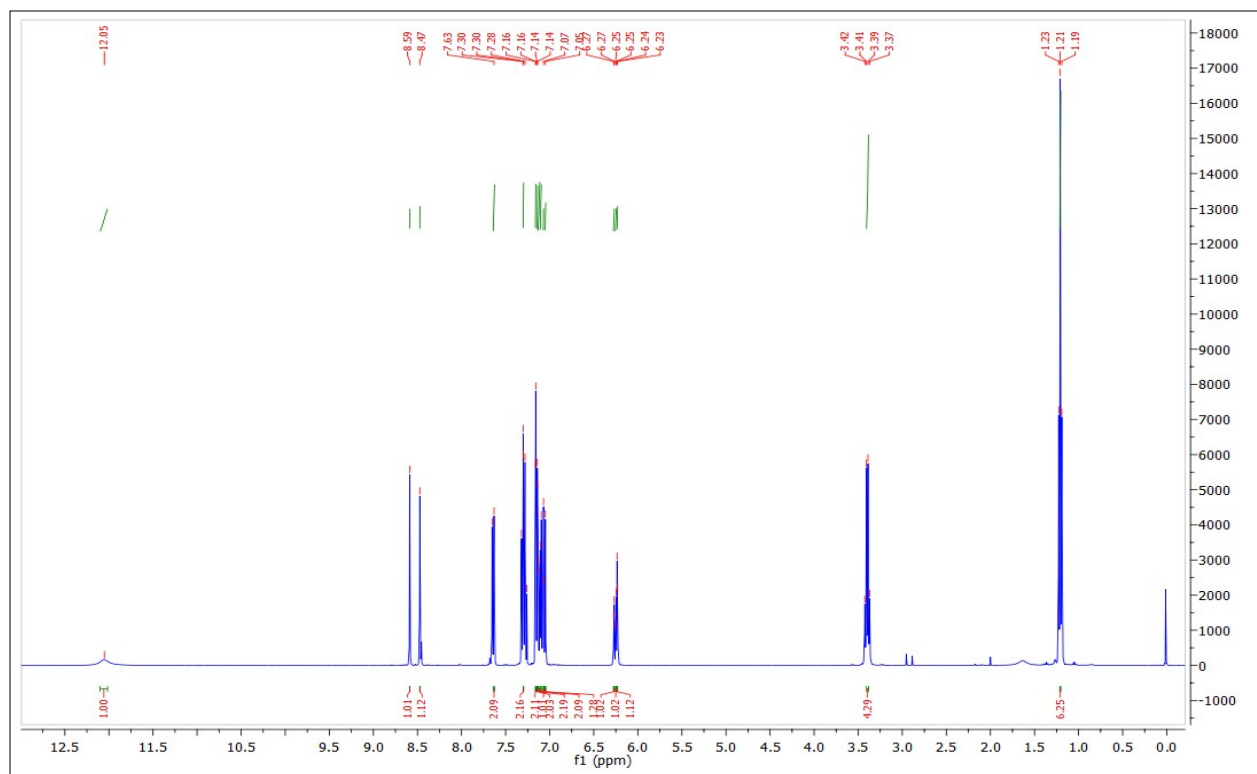

Figure S9.  $^1\text{H}$  NMR spectra of  $\text{L}_3$ .

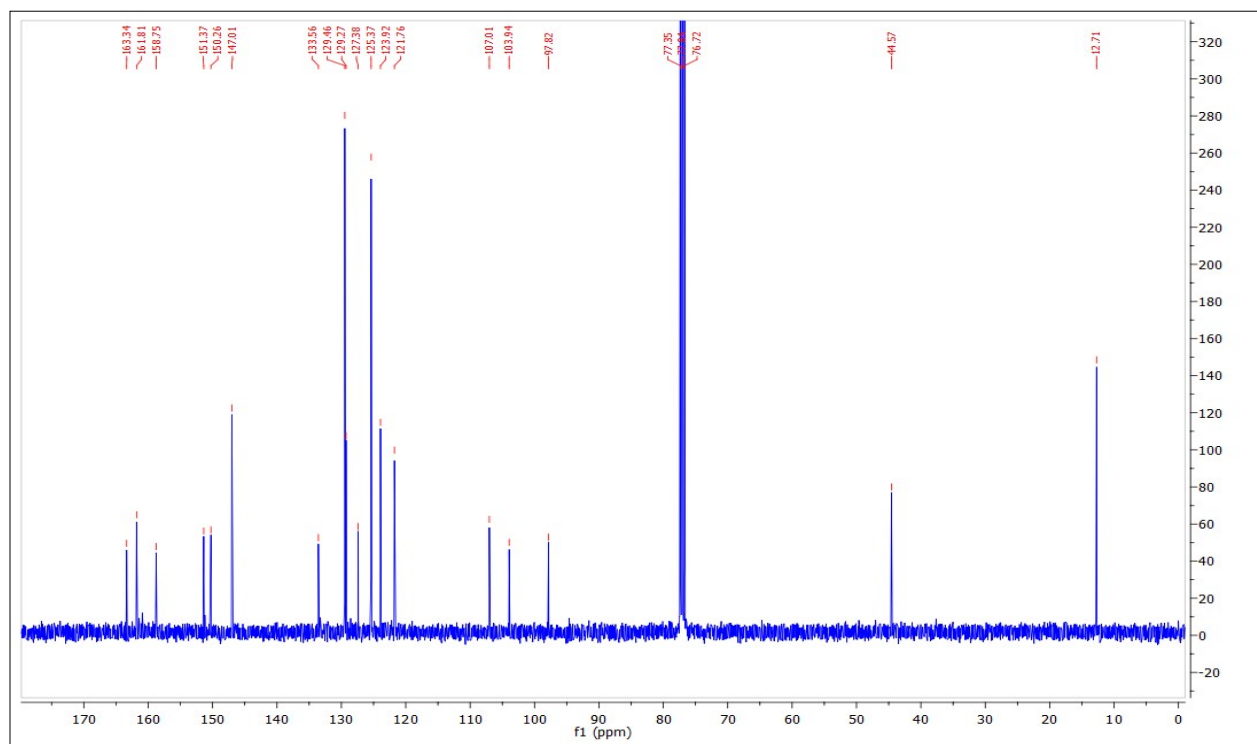

Figure S10.  $^{13}\text{C}$  NMR spectra of  $\text{L}_3$ .

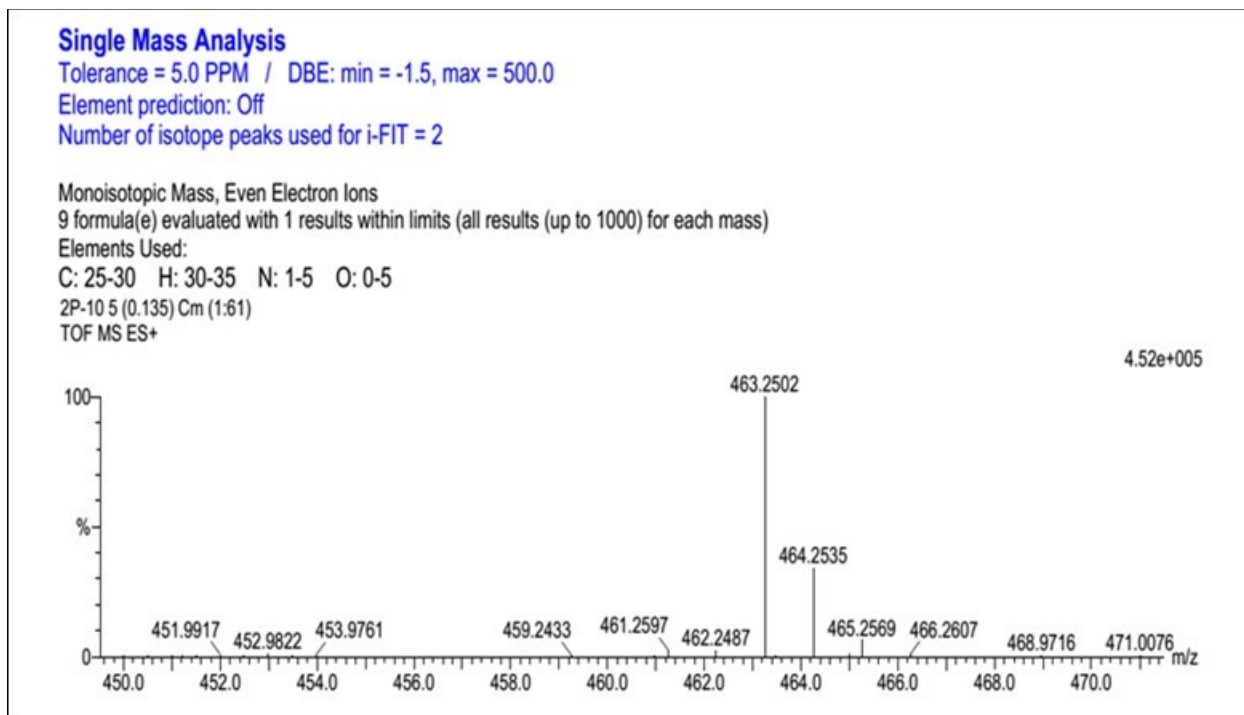

Figure S11. Mass spectra of L<sub>3</sub>.

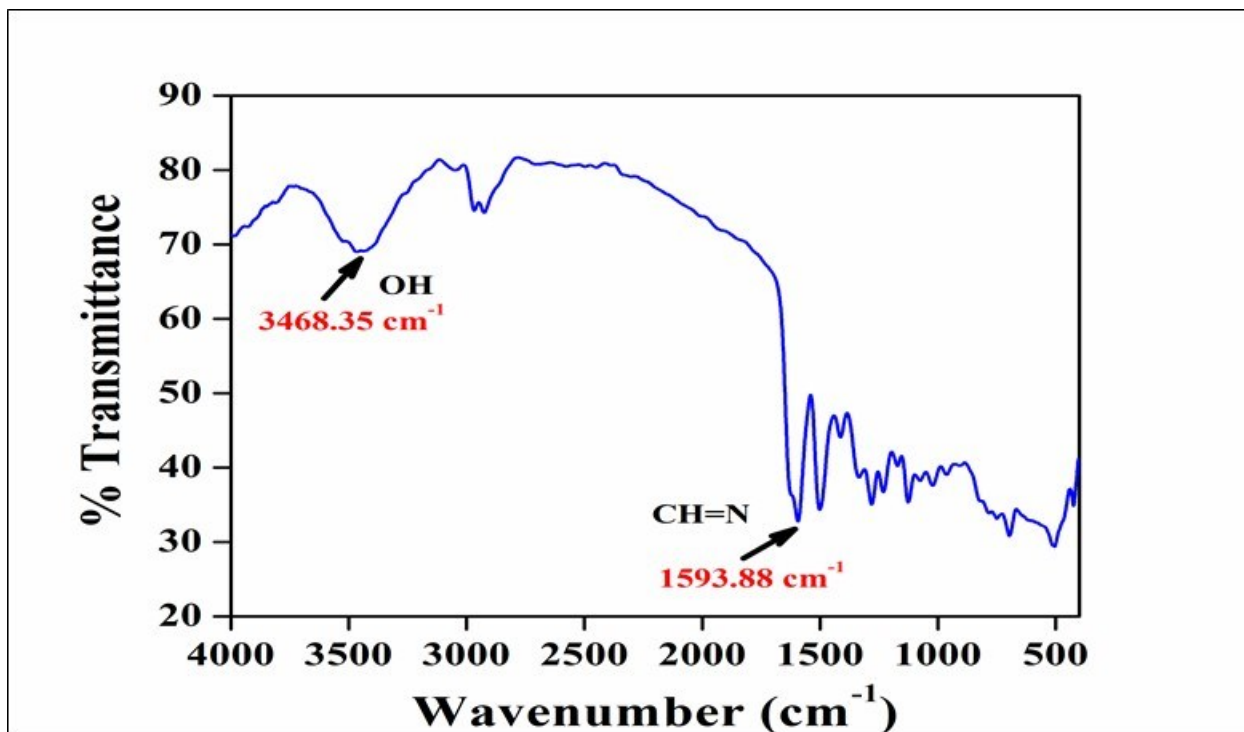

Figure S12. FT-IR spectra of L<sub>3</sub>.



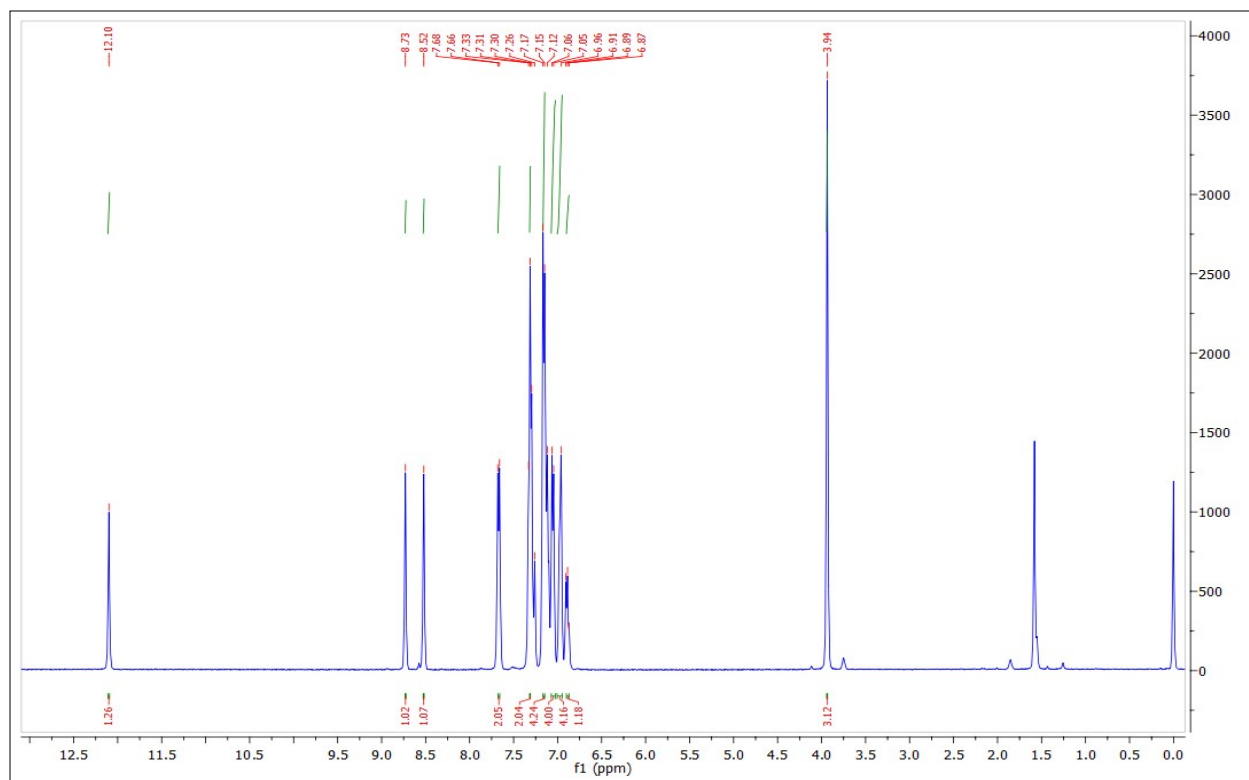

Figure S13. <sup>1</sup>H NMR spectra of L<sub>4</sub>.

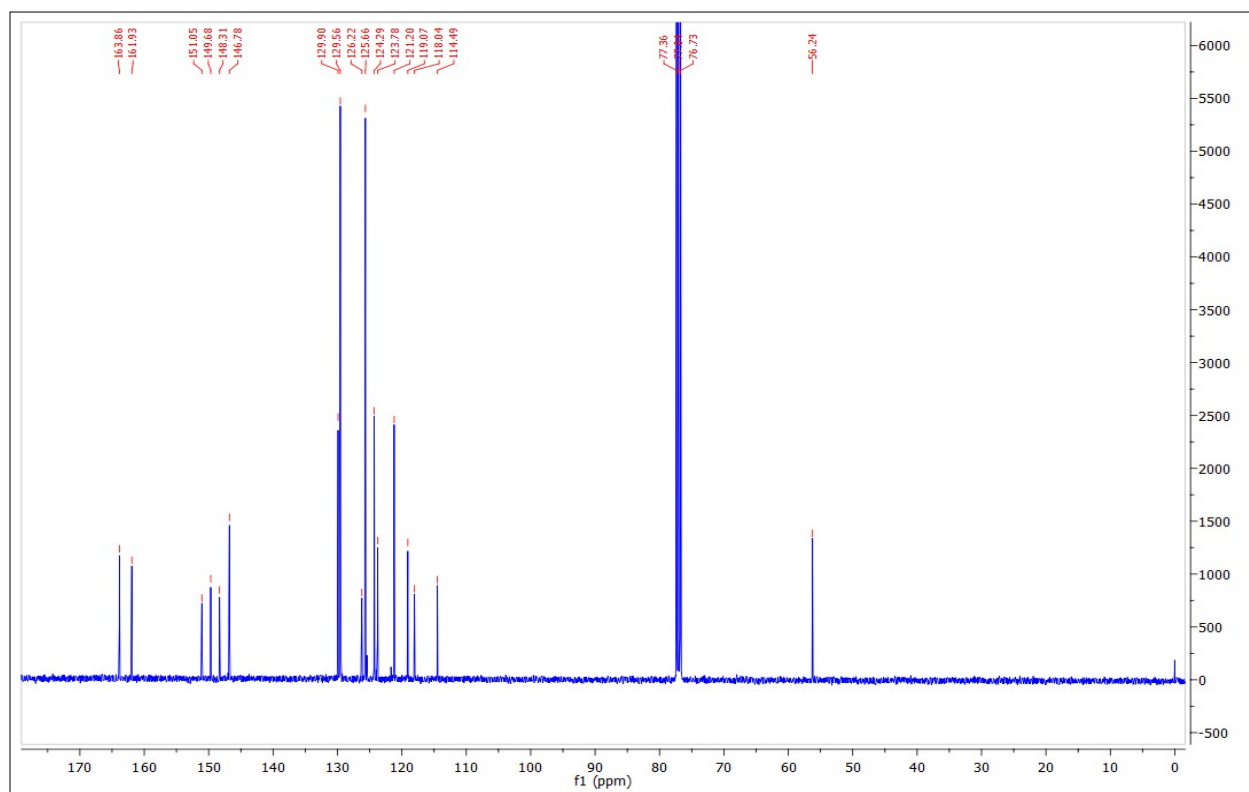

Figure S14. <sup>13</sup>C NMR spectra of L<sub>4</sub>.

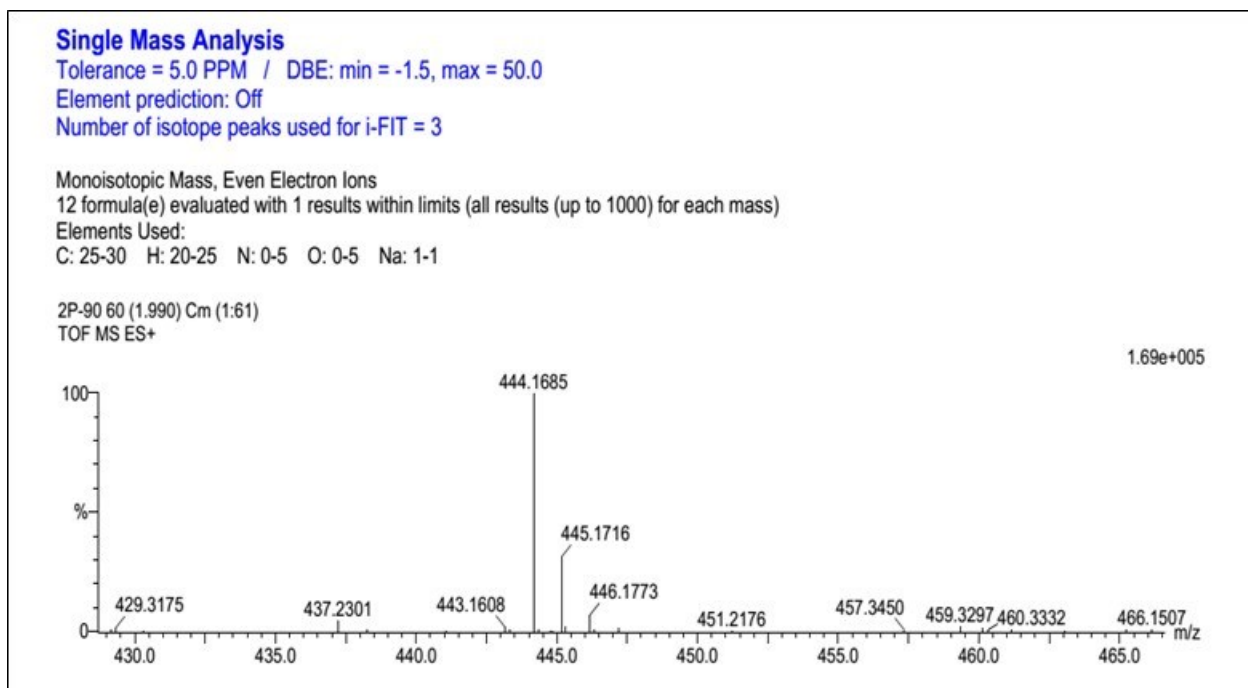

Figure S15. Mass spectra of L<sub>4</sub>.

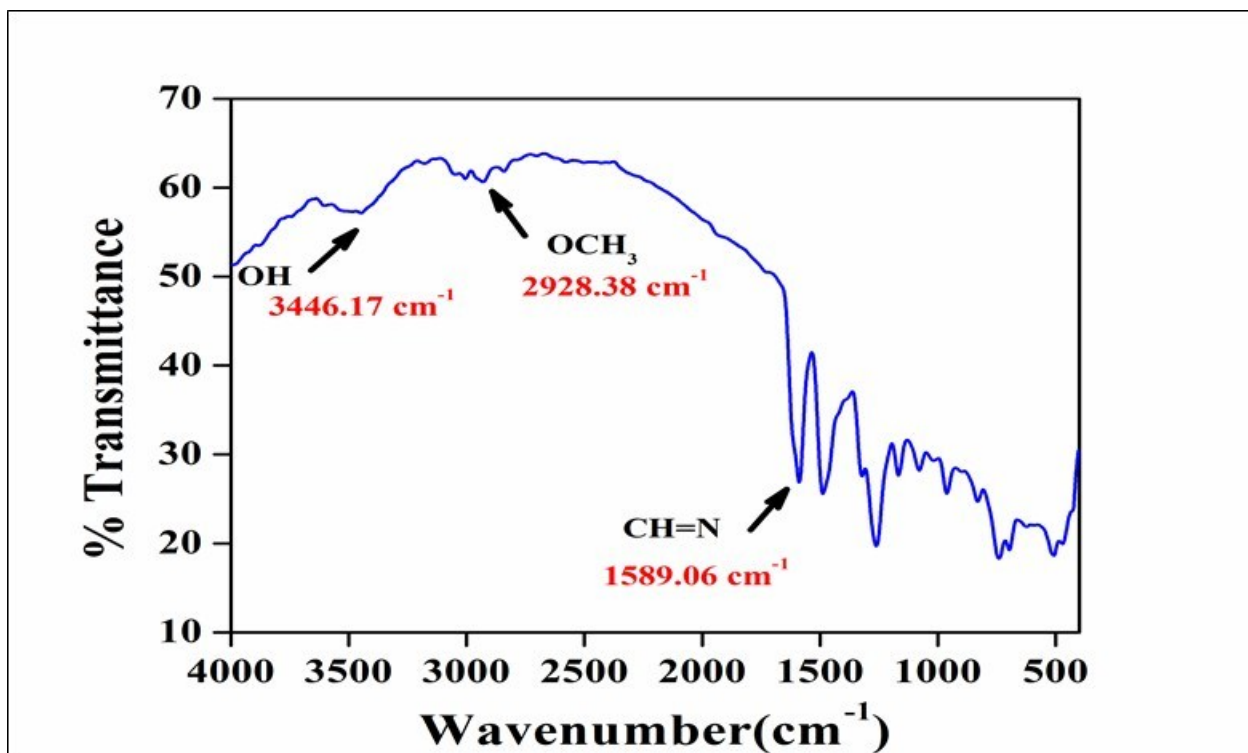

Figure S16. FT-IR spectra of L<sub>4</sub>.

**Table S1.** Optical transitions of **L<sub>1</sub> – L<sub>4</sub>** in different solvents.

| Solvents                | <b>L<sub>1</sub></b>   |                       |                   |                   | <b>L<sub>2</sub></b>   |                       |                   |                   | <b>L<sub>3</sub></b>   |                       |                   |                   | <b>L<sub>4</sub></b>   |                       |                   |                             |
|-------------------------|------------------------|-----------------------|-------------------|-------------------|------------------------|-----------------------|-------------------|-------------------|------------------------|-----------------------|-------------------|-------------------|------------------------|-----------------------|-------------------|-----------------------------|
|                         | $\lambda_{\text{abs}}$ | $\lambda_{\text{em}}$ | $\Phi_{\text{F}}$ | $\tau(\text{ns})$           |
| <b>Toluene</b>          | 391                    | 548,<br>568           | 0.015             | 0.18              | 410                    | 514,<br>542           | 0.048             | 0.10              | 407                    | 465,<br>487           | 0.043             | 0.20              | 364                    | 452                   | 0.001             | -                           |
| <b>CHCl<sub>3</sub></b> | 398                    | 542,<br>568(s)        | 0.052             | 0.22              | 412                    | 527,<br>547(s)        | 0.102             | 0.38              | 410                    | 476(s),<br>501        | 0.077             | 0.25              | 364                    | 513                   | 0.029             | 0.12 (54.47)<br>3.82(45.53) |
| <b>ACN</b>              | 389                    | 559                   | 0.028             | 0.25              | 405                    | 554(b)                | 0.086             | 0.30              | 406                    | 481,<br>494(s)        | 0.056             | 0.19              | 364                    | 553                   | 0.001             | 0.13(84.94)<br>2.16(15.06)  |
| <b>THF</b>              | 391                    | 542,<br>568(s)        | 0.011             | 0.07              | 408                    | 520,<br>540(s)        | 0.033             | 0.11              | 407                    | 469,<br>487           | 0.034             | 0.21              | 364                    | 486                   | 0.005             | 0.13(50.06)<br>1.54(49.93)  |
| <b>DMSO</b>             | 393                    | 578,<br>606(s)        | 0.023             | 0.38              | 408                    | 583(b)                | 0.080             | 0.49              | 413                    | 488                   | 0.073             | 0.29              | 364                    | 514                   | 0.012             | 0.10(95.23)<br>2.59(4.77)   |
| <b>MeOH</b>             | 392                    | 555                   | 0.013             | 0.10              | 405                    | 567(b)                | 0.026             | 0.20              | 414                    | 536                   | 0.082             | 0.45              | 369                    | 489,<br>554           | 0.002             | 0.28((98.21)<br>3.11(1.79)  |

Abbreviations:  $\lambda_{\text{ab}}$ = absorption maximum,  $\lambda_{\text{em}}$ = emission maximum,  $\Phi_{\text{F}}$ = fluorescence quantum yield,  $\tau(\text{ns})$ = Life time and s= shoulder peak.

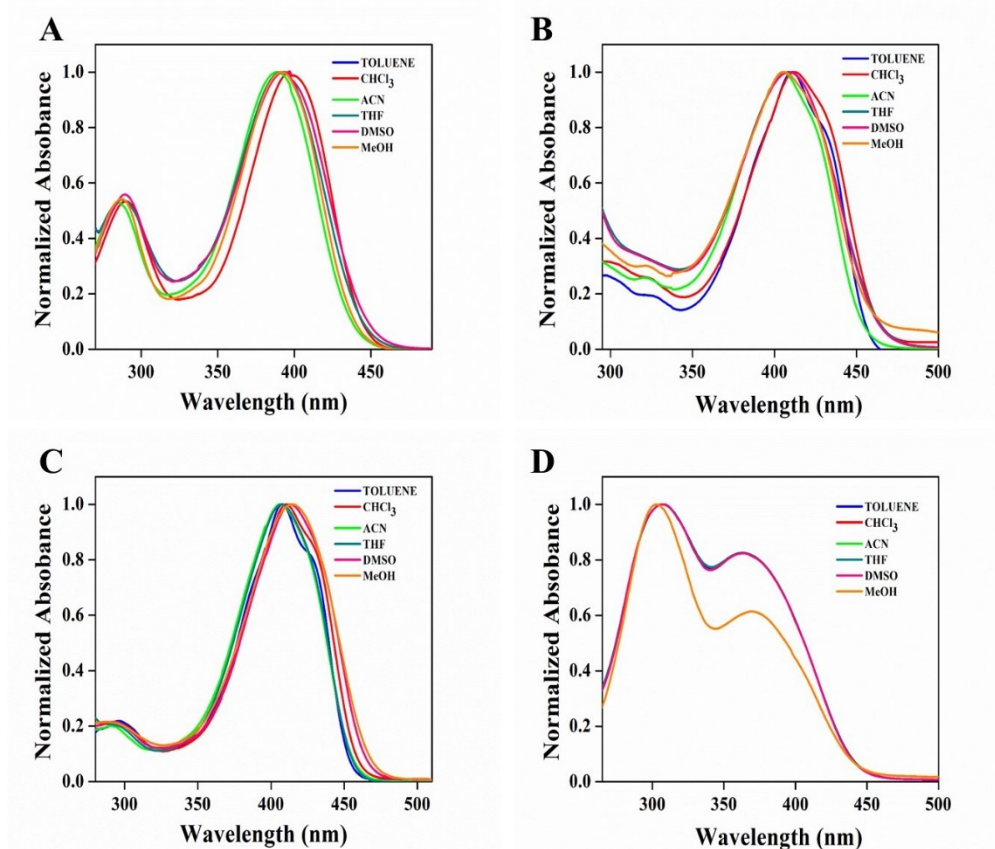

Figure S17. Normalized absorption spectra of the compounds (10  $\mu$ M) (A) L<sub>1</sub> (B) L<sub>2</sub> (C) L<sub>3</sub> and (D) L<sub>4</sub> in organic solvents with varying polarities.

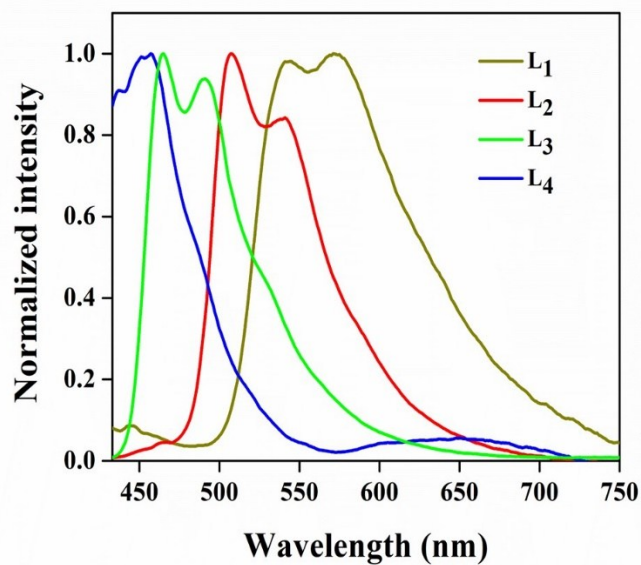

Figure S18. Normalized emission spectra of the compounds L<sub>1</sub>-L<sub>4</sub> in cyclohexane.

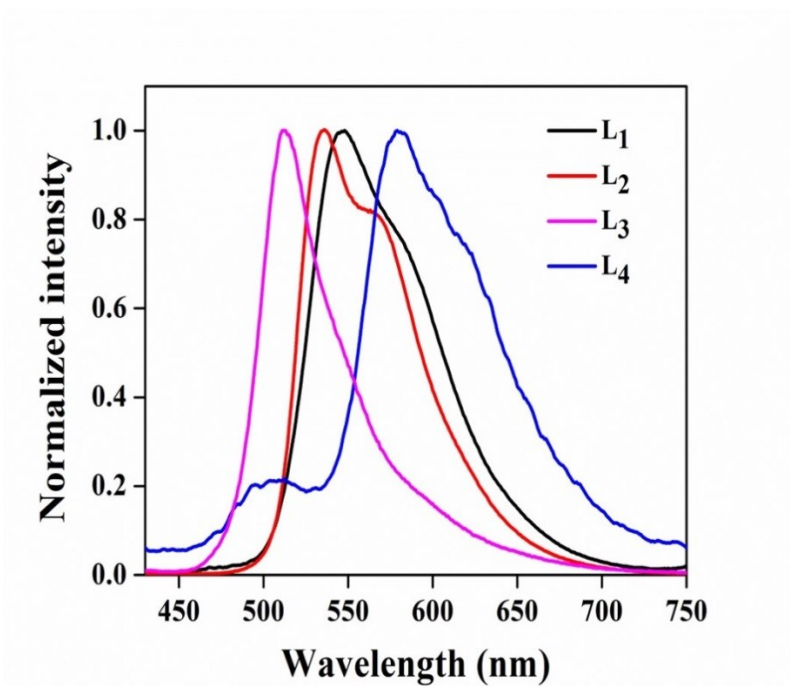

Figure S19. Normalized solid state emission spectra of the compounds L<sub>1</sub>-L<sub>4</sub>.

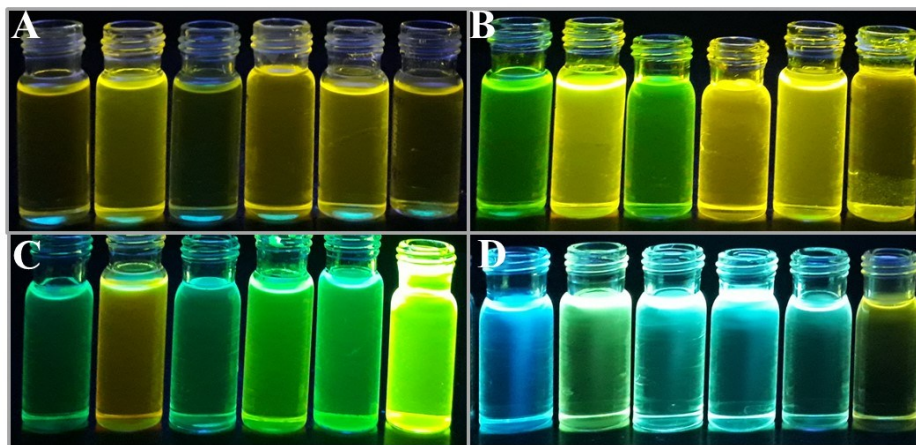

Figure S20. Fluorescence photographs of (A) L<sub>1</sub> (B) L<sub>2</sub> (C) L<sub>3</sub> and (D) L<sub>4</sub> in various organic solvents ranging from low polarity to high polarity (10  $\mu$ M) under UV lamp (365 nm). Toluene; chloroform; tetrahydrofuran; dimethyl sulfoxide; acetonitrile; methanol.

Table S2. Aggregation induced emission life time values of the L<sub>1</sub>-L<sub>4</sub>.

| Azine molecules | Lifetime in THF $\tau$ (ns) | Lifetime in 90% water :10% THF $\tau$ (ns) |
|-----------------|-----------------------------|--------------------------------------------|
| L <sub>1</sub>  | 0.12                        | 0.34 (89.29)<br>2.97 (10.71)               |
| L <sub>2</sub>  | 0.11                        | 0.49 (74.60)<br>1.44 (25.40)               |
| L <sub>3</sub>  | 0.21                        | 0.12(93.99)<br>1.48(6.01)                  |
| L <sub>4</sub>  | 0.13(50.06)<br>1.54(49.93)  | 0.53 (56.31)<br>5.64 (43.69)               |

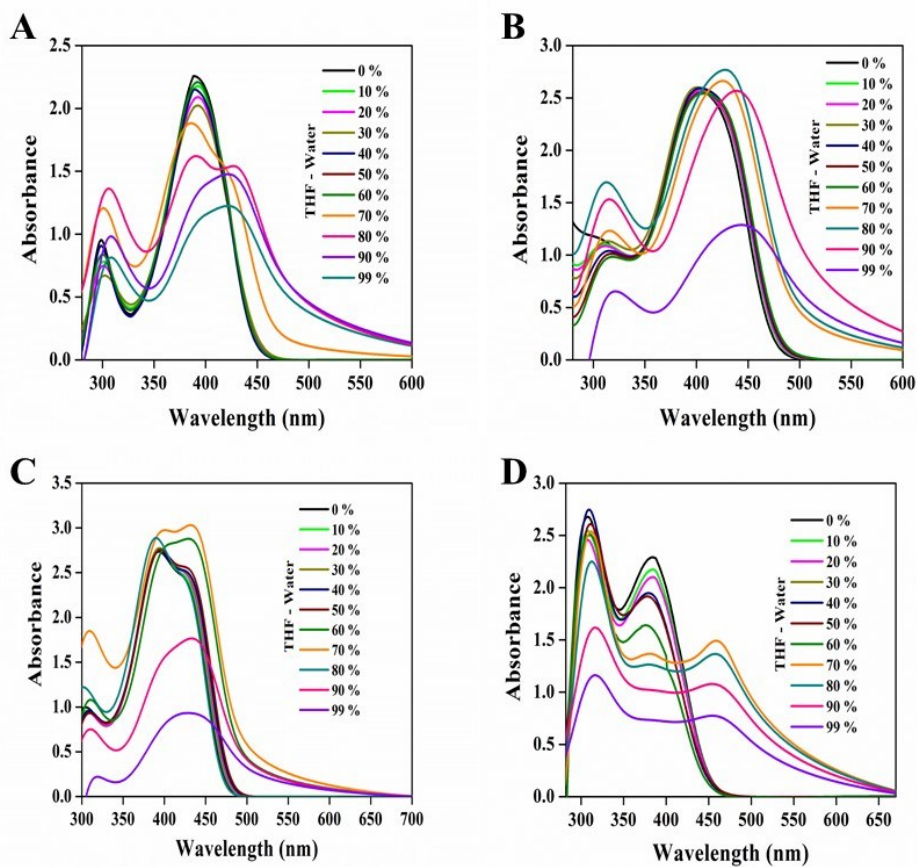

Figure S21. Absorption spectra of the compounds L<sub>1</sub>-L<sub>4</sub> (100  $\mu$ M) in THF-water mixture with various water fractions. 0-99%.



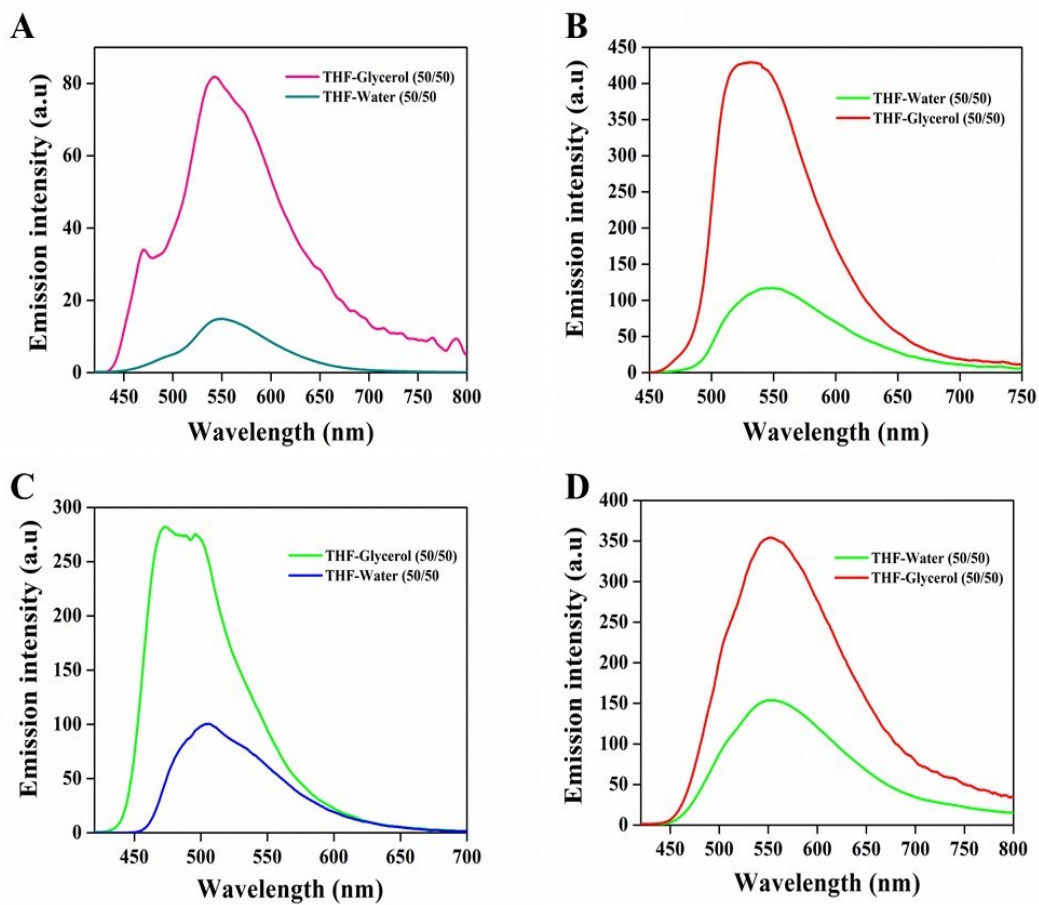

Figure S22. Fluorescence spectra of compounds (100  $\mu$ M) (A) L<sub>1</sub> (B) L<sub>2</sub> (C) L<sub>3</sub> and (D) L<sub>4</sub> in THF-water and THF-glycerol mixture.

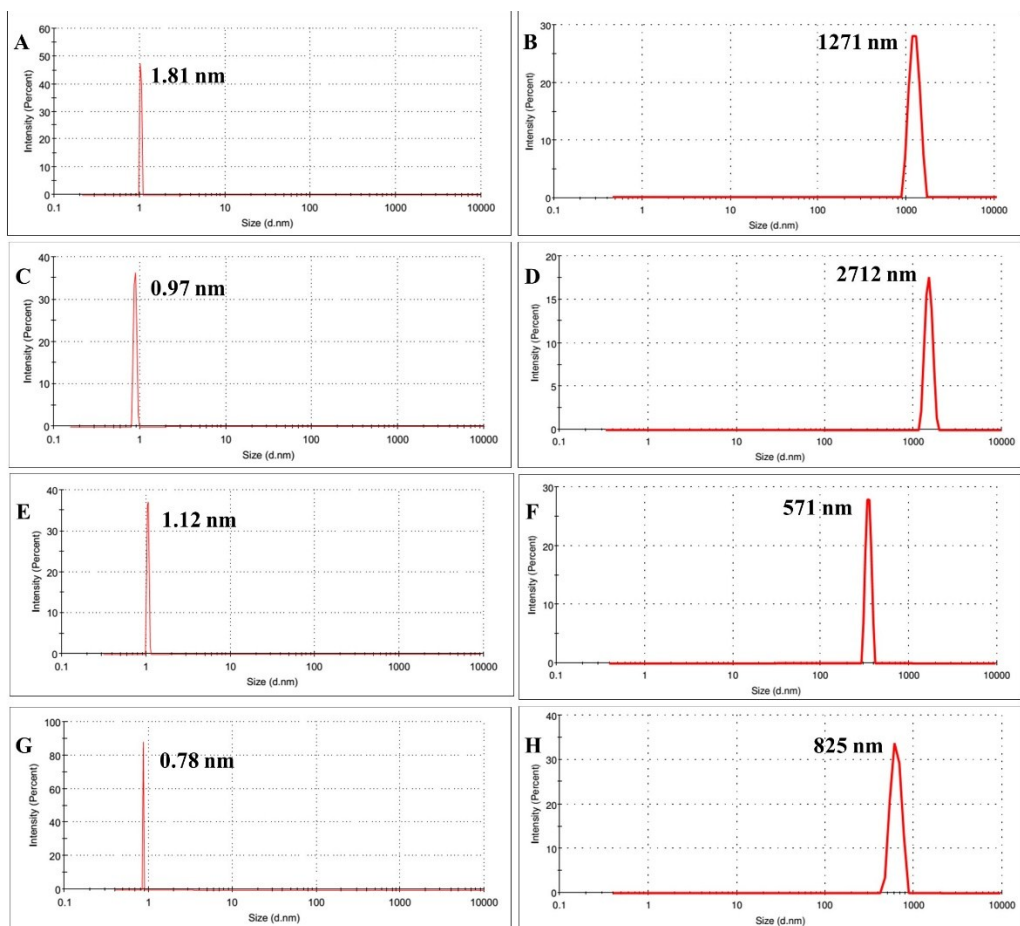

Figure S23. Dynamic light scattering measurements of compounds with particle size distribution in THF-water mixture A), B) L<sub>1</sub> (0 and 90 %), C), D) L<sub>2</sub> (0 and 90 %) E), F) L<sub>3</sub> (0 and 70%) and G), H) L<sub>4</sub> (0 and 90 %).

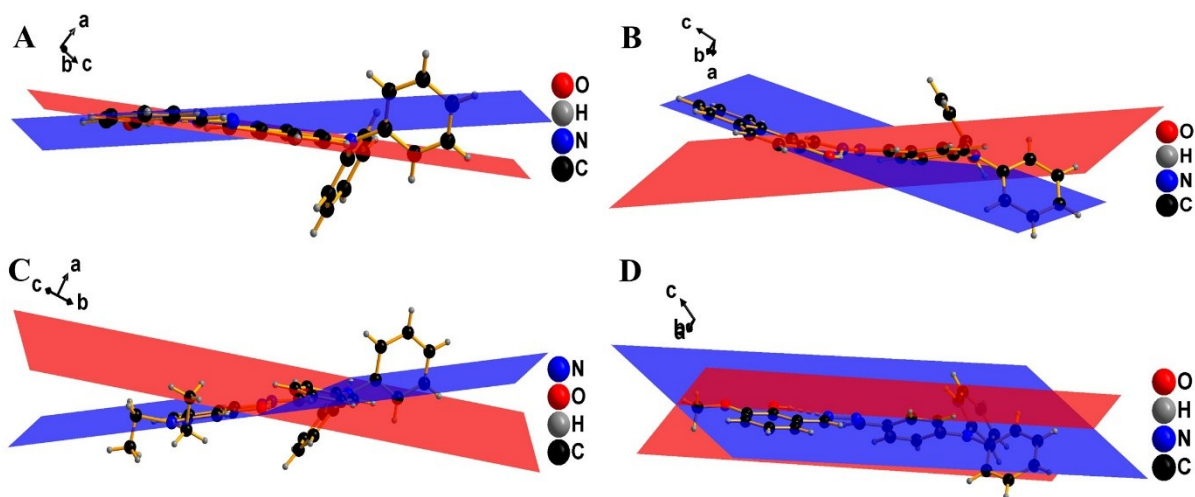

Figure S24. Non planar nature of molecular structure of L<sub>1</sub>-L<sub>4</sub>.



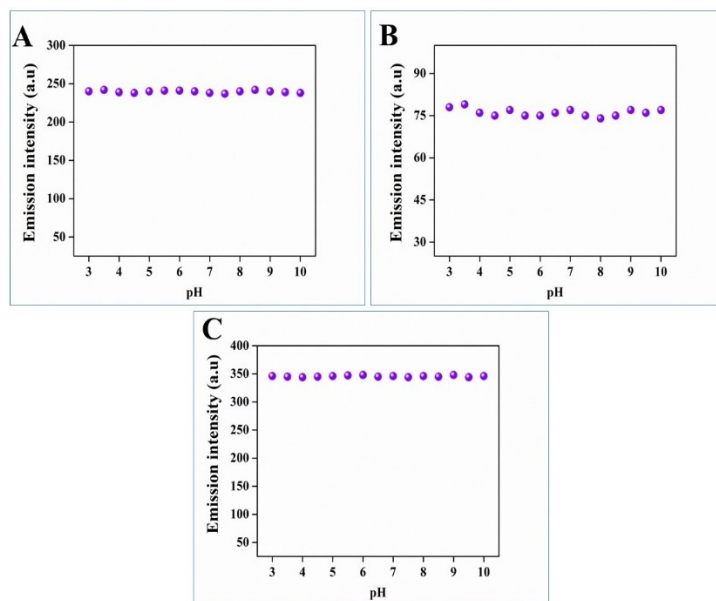

Figure S25. Emission curves intensities of compounds as a function of pH values A) L<sub>1</sub> B) L<sub>2</sub> and C) L<sub>4</sub>.

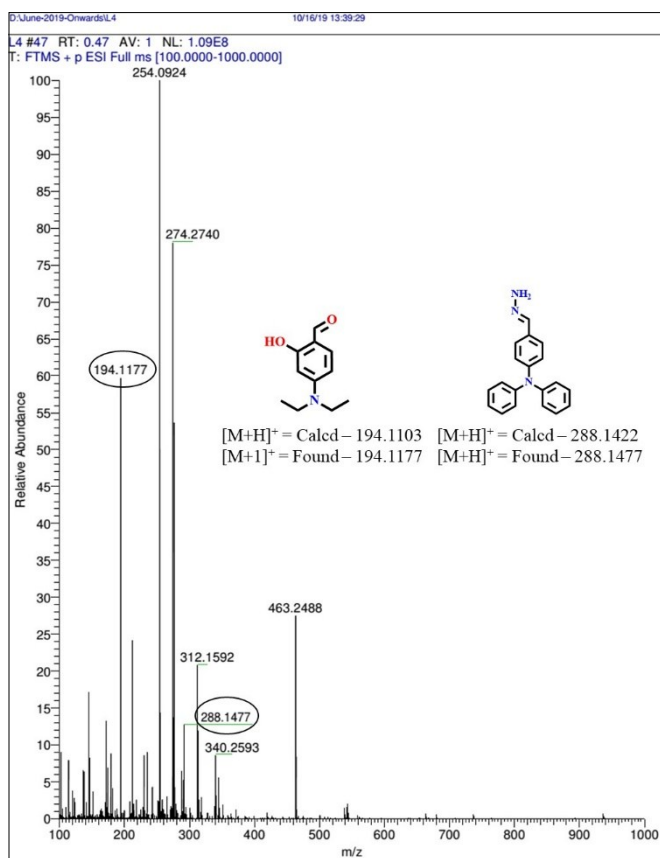

Figure S26. Positive ESI mass spectra of L<sub>3</sub> in MeOH after the addition of a drop of TFA acid.

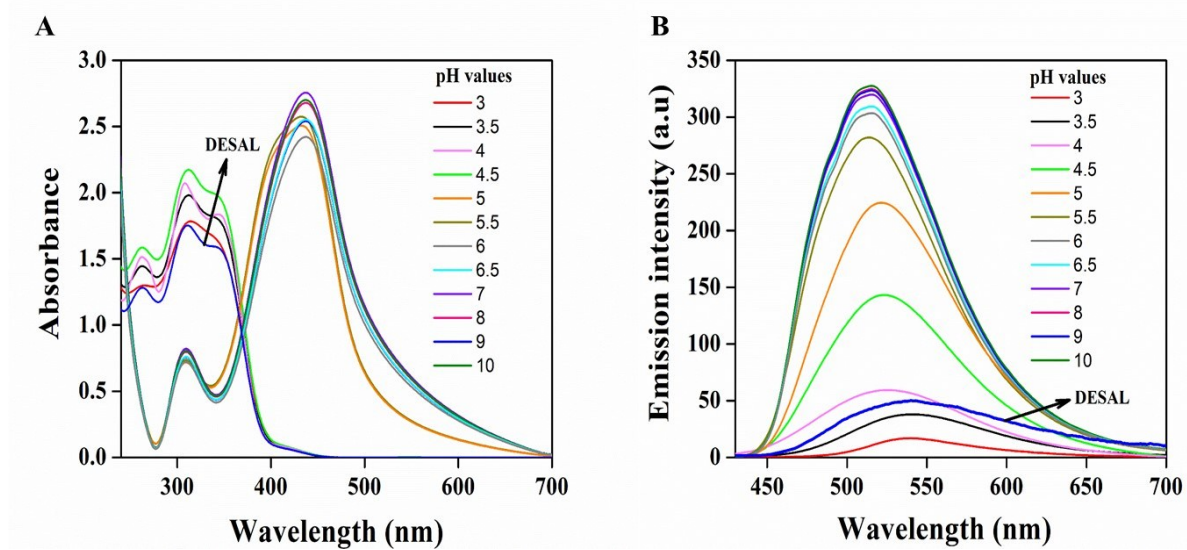

Figure S27. A) Absorption titration of L<sub>3</sub> as a function of pH values. B) Emission titration of L<sub>3</sub> as a function of pH values.

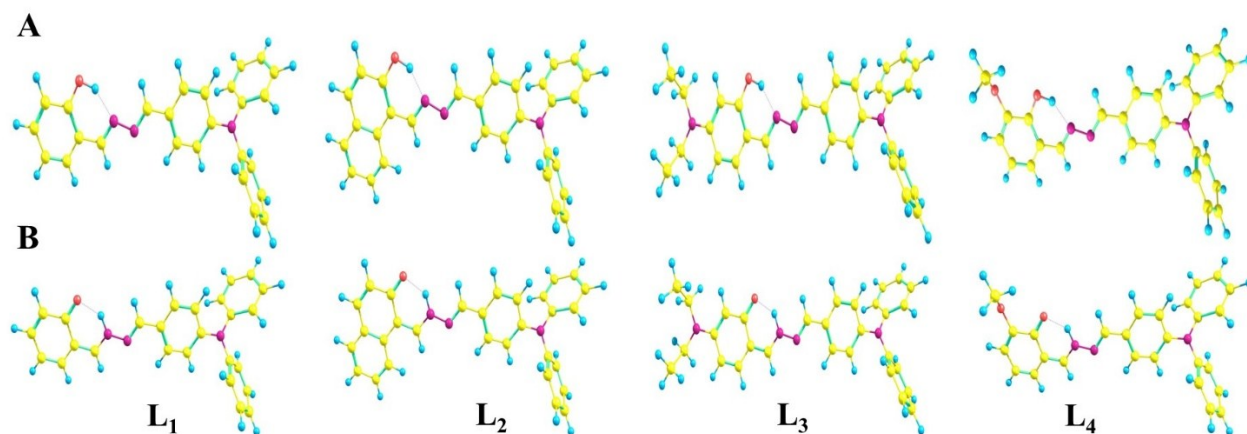

Figure S28. Optimized molecular structures of the compounds L<sub>1</sub>-L<sub>4</sub> (A) Enol form and (B) Keto form.

Table S3. Crystal data and details of the structure determination of L<sub>1</sub>, L<sub>2</sub>, L<sub>3</sub> and L<sub>4</sub>.

|                                 | L <sub>1</sub>                                                                                                | L <sub>2</sub>                                                                                    | L <sub>3</sub>                                                                                 | L <sub>4</sub>                                                                                                 |
|---------------------------------|---------------------------------------------------------------------------------------------------------------|---------------------------------------------------------------------------------------------------|------------------------------------------------------------------------------------------------|----------------------------------------------------------------------------------------------------------------|
| Empirical formula               | C <sub>26</sub> H <sub>21</sub> N <sub>3</sub> O                                                              | C <sub>30</sub> H <sub>23</sub> N <sub>3</sub> O                                                  | C <sub>30</sub> H <sub>30</sub> N <sub>4</sub> O                                               | C <sub>27</sub> H <sub>23</sub> N <sub>3</sub> O <sub>2</sub>                                                  |
| Formula weight                  | 391.46                                                                                                        | 441.51                                                                                            | 462.58                                                                                         | 421.48                                                                                                         |
| Temperature                     | 296(2) K                                                                                                      | 296(2) K                                                                                          | 296(2) K                                                                                       | 296(2) K                                                                                                       |
| Wavelength                      | 0.71073 Å                                                                                                     | 0.71073 Å                                                                                         | 0.71073 Å                                                                                      | 0.71073 Å                                                                                                      |
| Crystal system                  | Triclinic                                                                                                     | Monoclinic                                                                                        | Monoclinic                                                                                     | Triclinic                                                                                                      |
| Space group                     | P-1                                                                                                           | P2 <sub>1</sub> /c                                                                                | P2 <sub>1</sub> /n                                                                             | P-1                                                                                                            |
| Unit cell dimensions            | a = 7.4345(6) Å<br>b = 7.7857(7) Å<br>c = 18.3205(16) Å<br>α = 81.464(5)°<br>β = 87.016(5)°<br>γ = 86.135(5)° | a = 9.7349(2) Å<br>b = 26.4673(4) Å<br>c = 9.6839(2) Å<br>α = 90°<br>β = 110.1070(10)°<br>γ = 90° | a = 9.5818(3) Å<br>b = 9.2966(3) Å<br>c = 29.1439(9) Å<br>α = 90°<br>β = 96.654(2)°<br>γ = 90° | a = 9.0523(2) Å<br>b = 9.4796(3) Å<br>c = 15.3386(4) Å<br>α = 101.215(2)°<br>β = 96.659(2)°<br>γ = 117.266(2)° |
| Volume                          | 1045.36(16) Å <sup>3</sup>                                                                                    | 2343.05(8) Å <sup>3</sup>                                                                         | 2578.60(14) Å <sup>3</sup>                                                                     | 1115.46(6) Å <sup>3</sup>                                                                                      |
| Z                               | 2                                                                                                             | 4                                                                                                 | 4                                                                                              | 2                                                                                                              |
| Density (calculated)            | 1.244 Mg/m <sup>3</sup>                                                                                       | 1.252 Mg/m <sup>3</sup>                                                                           | 1.192 Mg/m <sup>3</sup>                                                                        | 1.255 Mg/m <sup>3</sup>                                                                                        |
| Absorption coefficient          | 0.077 mm <sup>-1</sup>                                                                                        | 0.077 mm <sup>-1</sup>                                                                            | 0.074 mm <sup>-1</sup>                                                                         | 0.080 mm <sup>-1</sup>                                                                                         |
| F(000)                          | 412                                                                                                           | 928                                                                                               | 984                                                                                            | 444                                                                                                            |
| Crystal size                    | 0.2 x 0.15 x 0.15 mm <sup>3</sup>                                                                             | 0.2 x 0.1 x 0.1 mm <sup>3</sup>                                                                   | 0.3 x 0.2 x 0.2 mm <sup>3</sup>                                                                | 0.15 x 0.1 x 0.1 mm <sup>3</sup>                                                                               |
| Theta range for data collection | 2.250 to 28.304°                                                                                              | 2.228 to 28.298°                                                                                  | 1.407 to 28.478°                                                                               | 2.513 to 28.312°                                                                                               |
| Index ranges                    | -9 ≤ h ≤ 8,<br>-10 ≤ k ≤ 10,<br>-24 ≤ l ≤ 24                                                                  | -12 ≤ h ≤ 12,<br>-35 ≤ k ≤ 34,<br>-8 ≤ l ≤ 12                                                     | -12 ≤ h ≤ 12,<br>-10 ≤ k ≤ 12,<br>-36 ≤ l ≤ 39                                                 | -12 ≤ h ≤ 12,<br>-12 ≤ k ≤ 12,<br>-20 ≤ l ≤ 19                                                                 |
| Reflections collected           | 16787                                                                                                         | 19851                                                                                             | 25223                                                                                          | 20856                                                                                                          |
| Independent reflections         | 5150 [R(int) = 0.0273]                                                                                        | 5232 [R(int) = 0.0926]                                                                            | 6472 [R(int) = 0.0556]                                                                         | 5541 [R(int) = 0.0367]                                                                                         |
| Completeness to theta = 25.242° | 99.8 %                                                                                                        | 86.7 %                                                                                            | 100.0 %                                                                                        | 99.9 %                                                                                                         |
| Absorption correction           | Semi-empirical from equivalents                                                                               | Semi-empirical from equivalents                                                                   | Semi-empirical from equivalents                                                                | Semi-empirical from equivalents                                                                                |
| Max. and min. transmission      | 0.7457 and 0.7184                                                                                             | 0.7457 and 0.6879                                                                                 | 0.7457 and 0.6679                                                                              | 0.7457 and 0.7015                                                                                              |
| Refinement method               | Full-matrix least-squares on F <sup>2</sup>                                                                   | Full-matrix least-squares on F <sup>2</sup>                                                       | Full-matrix least-squares on F <sup>2</sup>                                                    | Full-matrix least-squares on F <sup>2</sup>                                                                    |
| Data / restraints / parameters  | 5150 / 0 / 271                                                                                                | 5232 / 0 / 307                                                                                    | 6472 / 0 / 316                                                                                 | 5541 / 0 / 289                                                                                                 |
| Goodness-of-fit on              | 0.999                                                                                                         | 0.777                                                                                             | 1.059                                                                                          | 1.015                                                                                                          |

|                                  |                                    |                                    |                                    |                                    |
|----------------------------------|------------------------------------|------------------------------------|------------------------------------|------------------------------------|
| F <sup>2</sup>                   |                                    |                                    |                                    |                                    |
| Final R indices<br>[I>2sigma(I)] | R1 = 0.0459, wR2 =<br>0.1293       | R1 = 0.0480, wR2 =<br>0.0960       | R1 = 0.0707, wR2 =<br>0.1926       | R1 = 0.0490, wR2 =<br>0.1110       |
| R indices (all data)             | R1 = 0.0870,<br>wR2 = 0.1549       | R1 = 0.1827,<br>wR2 = 0.1255       | R1 = 0.1542,<br>wR2 = 0.2428       | R1 = 0.1179,<br>wR2 = 0.1356       |
| Extinction<br>coefficient        | n/a                                | n/a                                | n/a                                | n/a                                |
| Largest diff. peak<br>and hole   | 0.164 and -0.171 e.Å <sup>-3</sup> | 0.124 and -0.129 e.Å <sup>-3</sup> | 0.369 and -0.346 e.Å <sup>-3</sup> | 0.128 and -0.174 e.Å <sup>-3</sup> |
